# Supplementary material for: Nonaqueous synthesis of TiO2–carbon hybrid nanomaterials with enhanced stable photocatalytic hydrogen production activity
Source: Royal Society of Chemistry journal article supplement (doi:10.1039/c5ta00638d), 2015-01-01
Supplement: c5ta00638d1.pdf [file c5ta00638d1.pdf]

## **Nonaqueous synthesis of TiO<sub>2</sub>-carbon hybrid nanomaterials with enhanced stable photocatalytic hydrogen production activity**

**Yijun Yang,<sup>a</sup> Ye Yao,<sup>b</sup> Liu He,<sup>b</sup> Yeteng Zhong,<sup>a</sup> Ying Ma<sup>\*b</sup> and Jiannian Yao<sup>\*a</sup>**

*<sup>a</sup>Beijing National Laboratory for Molecular Science, Key Laboratory of Photochemistry, Institute of Chemistry, Chinese Academy of Sciences, Beijing, 100190, People's Republic of China.*

*<sup>b</sup>State Key Laboratory of Material Processing and Die & Mould Technology, School of Material Sciences and Engineering, Huazhong University of Science and Technology, Wuhan, 430074, People's Republic of China.*

*Corresponding author: jnyao@iccas.ac.cn; yingma@hust.edu.cn*

Figure S1. The emission spectra of Xe light source (CEL-HXF300, Beijing Aulight Co., Ltd.) with and without the 400 nm long wave pass filter.

Figure S2. XPS spectra of TiO<sub>2</sub> NS-C and TiO<sub>2</sub> NP-C: a) Ti 2p; b) O 1s; c) C 1s.

Figure S3. UV-vis absorption spectrum of as-prepared TiO<sub>2</sub> nanosheets in hexane.

Figure S4. The transient photocurrent responses of the PEC cells using TiO<sub>2</sub> NS-C, TiO<sub>2</sub> NP-C, TiO<sub>2</sub> NP and TiO<sub>2</sub> NS as working electrodes for three 50 seconds light-on-off cycles under an illumination of 10 mW·cm<sup>-2</sup>.

Figure S5. Diffuse reflectance UV-visible spectra (a, c) and IR spectra (b, d) of TiO<sub>2</sub> NS-C (a, b) and TiO<sub>2</sub> NP-C (c, d) before and after photocatalysis.

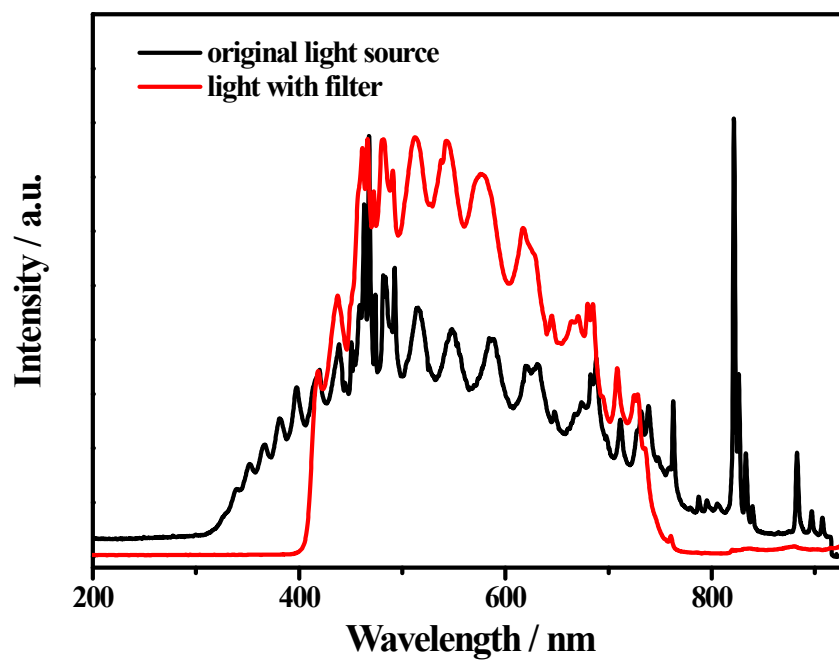

Figure S1. The emission spectra of Xe light source (CEL-HXF300, Beijing Aulight Co., Ltd.) with and without the 400 nm long wave pass filter.

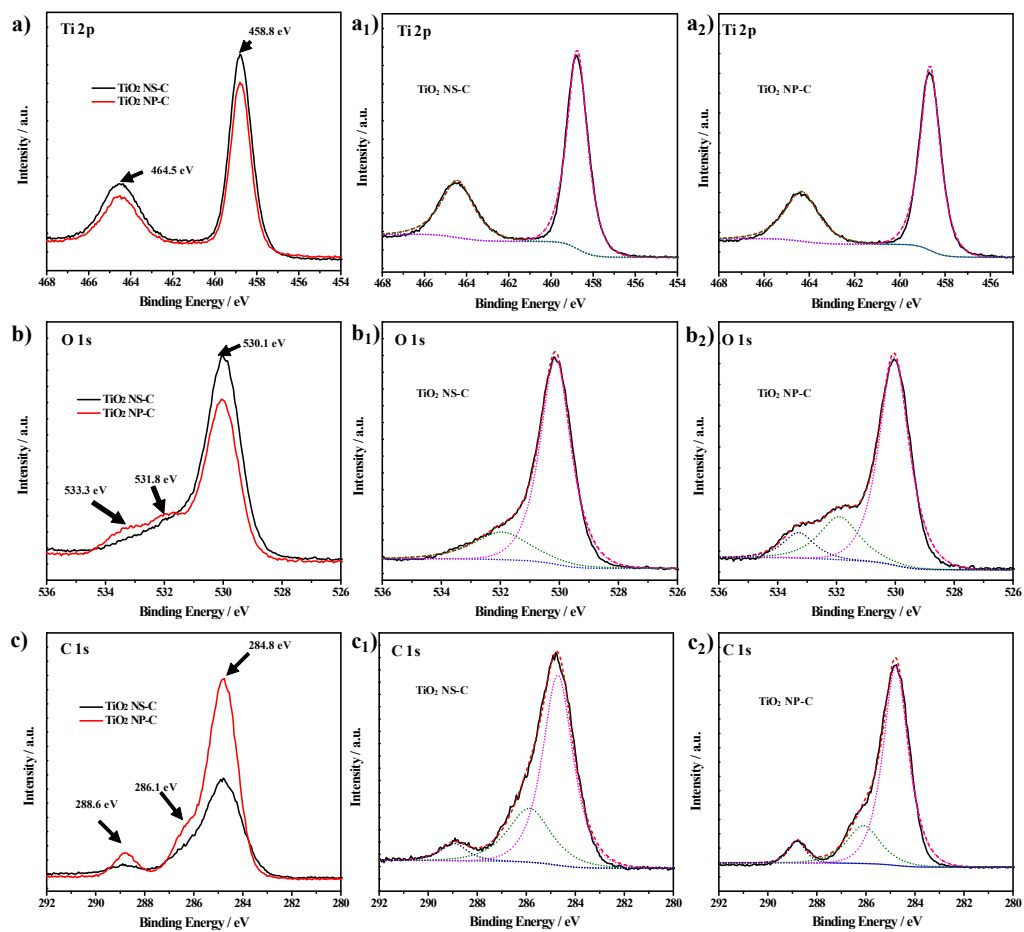

Figure S2. XPS spectra of TiO<sub>2</sub> NS-C and TiO<sub>2</sub> NP-C: a) Ti 2p; b) O 1s; c) C 1s.

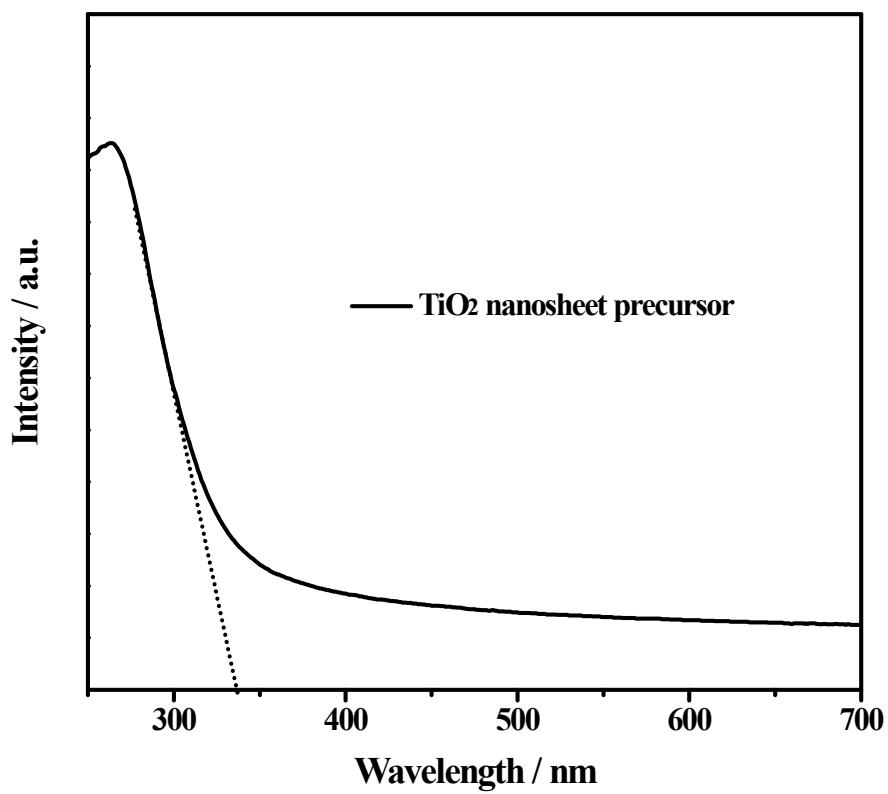

Figure S3. UV-vis absorption spectrum of as-prepared TiO<sub>2</sub> nanosheets in hexane. The bandgap energy is calculated to be 3.68 eV.

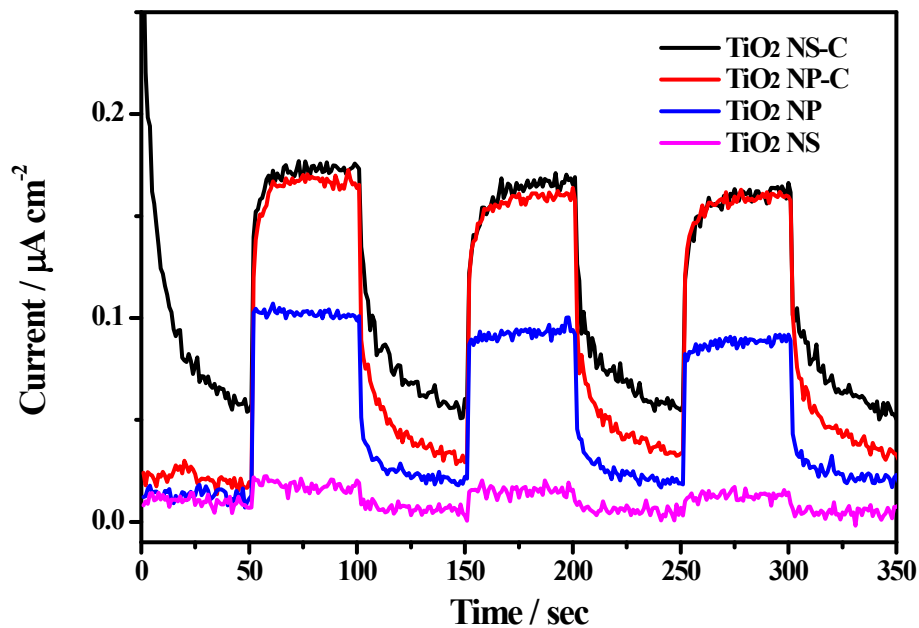

Figure S4. The transient photocurrent responses of the PEC cells using  $\text{TiO}_2$  NS-C,  $\text{TiO}_2$  NP-C,  $\text{TiO}_2$  NP and  $\text{TiO}_2$  NS as working electrodes for three 50 seconds light-on-off cycles under an illumination of  $10 \text{ mW}\cdot\text{cm}^{-2}$ .

Transient photocurrent response was performed on a Zennium electrochemical workstation (ZAHNER, Germany) in a standard three-electrode system with the as-prepared samples as the working electrodes with an active area of *ca.*  $1 \text{ cm}^2$ , a Pt wire as the counter electrode and Ag/AgCl (saturating KCl) as the reference electrode, which includes a UV light source (365 nm) and the corresponding control system.  $1 \text{ M Na}_2\text{SO}_4$  aqueous solution was used as the electrolyte. For working electrodes, FTO glass ( $2 \text{ cm} \times 1.2 \text{ cm}$ ) was immersed in an ethanolic dispersion of photocatalyst and followed by drying in the air. This process was repeated several times until the coated photocatalyst reaches *ca.*  $0.4 \text{ mg}\cdot\text{cm}^{-2}$  on FTO glass. The amperometric *I-t* curves were recorded under an illumination of  $10 \text{ mW}\cdot\text{cm}^{-2}$  for three 50 seconds light-on-off cycles.

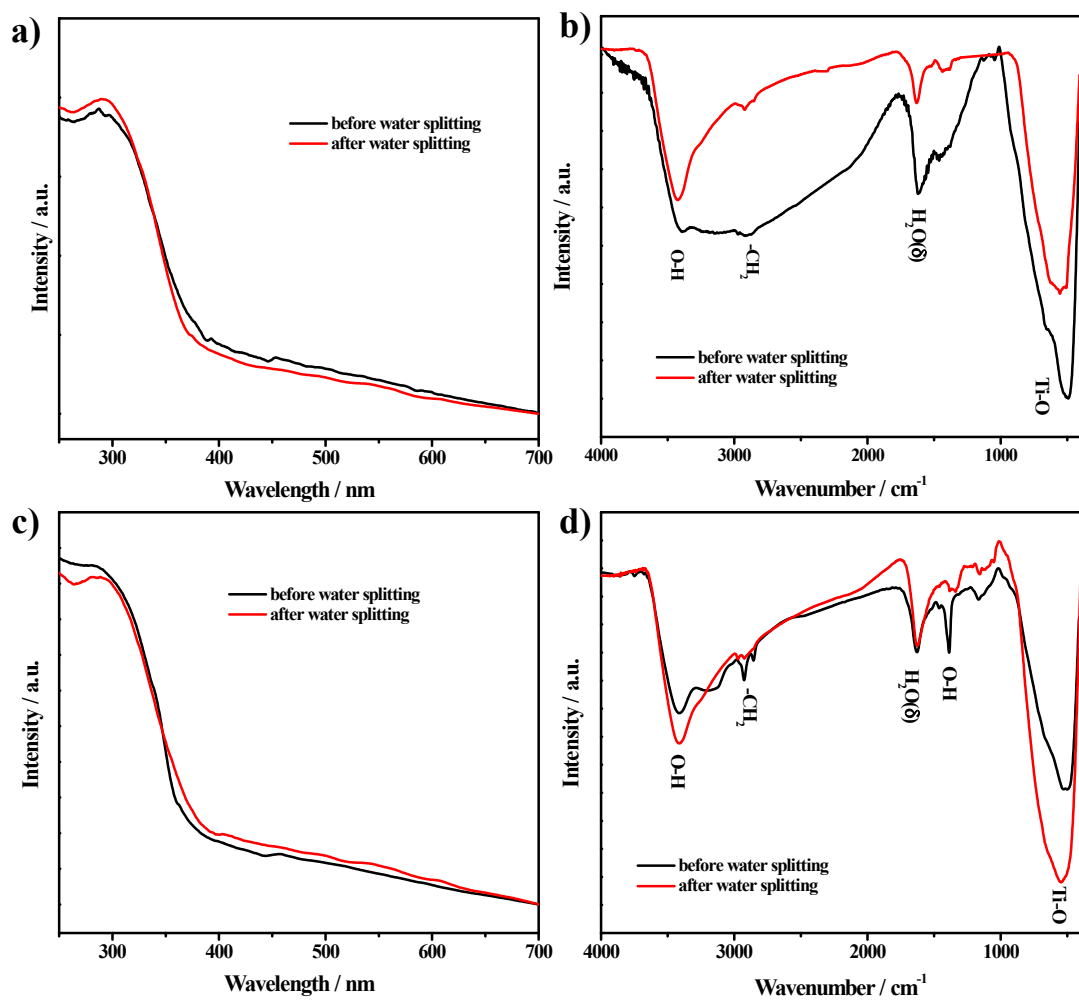

Figure S5. Diffuse reflectance UV-visible spectra (a, c) and IR spectra (b, d) of TiO<sub>2</sub> NS-C (a, b) and TiO<sub>2</sub> NP-C (c, d) before and after photocatalysis.
